# Supplementary material for: Electronic and geometrical parametrization of the role of organic/inorganic cations on the photovoltaic perovskite band gap
Source: Royal Society of Chemistry journal article supplement (doi:10.1039/d0cp05142j), 2020-01-01
Supplement: d0cp05142j1.pdf [file d0cp05142j1.pdf]

## Electronic Supplementary Information (ESI)

# Electronic and Geometrical Parametrization of Organic/ Inorganic Cation Role on Photovoltaic Perovskite Band Gap

M. Kanani, M. Moaddeli

Department of Materials Science and Engineering, School of Engineering, Shiraz University, Iran

### PDOS

PDOS for CsPbI<sub>3</sub>, MAPbI<sub>3</sub>, FAPbI<sub>3</sub> and also their PbI<sub>3</sub> scaffold in the form of top-down are depicted in Figure 1 in range of -10 to +5 eV. Fermi level is shifted to adapt VBM at zero. Contribution of lead and iodine in total DOS are represented in their orbital details as provided in their pseudopotential, i.e. *s*, *p*, and *d* for lead, and *s* and *p* for iodine. The coloring combination was chosen uniformly in all figures. VBM is mainly contributed by 5*p* orbital of iodine, while 6*s* orbital of lead is responsible for CBM (Wang, Xiao, and Wang 2020)(Zhu and Liu 2016). In the case of CsPbI<sub>3</sub>, the states of cation (Cs) is 6 eV far from VBM, while a 4 eV of energy level difference could be seen for MAPbI<sub>3</sub> and FAPbI<sub>3</sub>. This reveals the more impact of cation in MAPbI<sub>3</sub>/FAPbI<sub>3</sub> rather than CsPbI<sub>3</sub>. By eliminating cation from the middle of PbI<sub>3</sub> scaffold, while preserving cell parameters and Pb/I positions, the amplitude of total DOS in VBM is increased; Moreover, the band gap is decreased, which is attributed to the impact of cation. Band structure calculation is also confirming the sensible impact of cation on VB rather than CB.

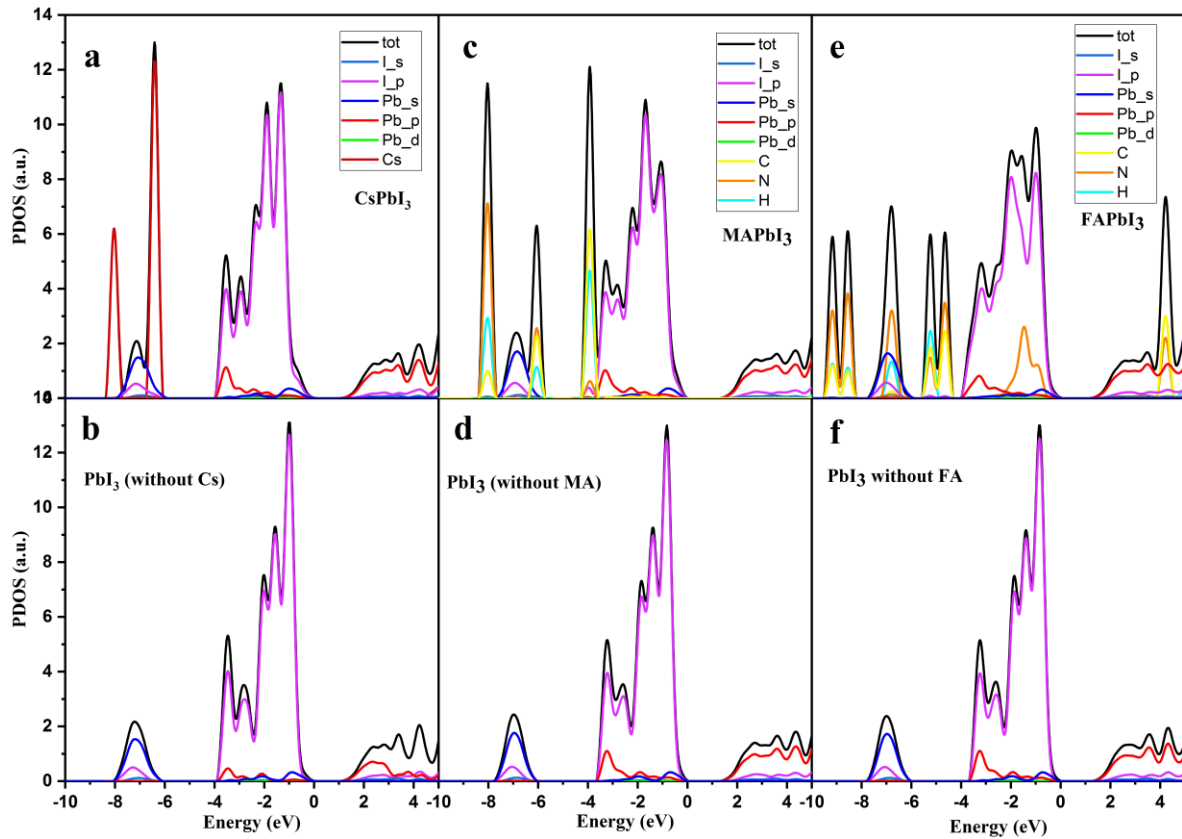

Figure 1: PDOS for (a): CsPbI<sub>3</sub>, (c): MAPbI<sub>3</sub>, and (e): FAPbI<sub>3</sub> using DFT-1/2. PDOS without the corresponding A-cation (b, d, and f) is also plotted for comparison.

## Band structures

Band structure of CsPbI<sub>3</sub>, MAPbI<sub>3</sub>, and FAPbI<sub>3</sub> using DFT-1/2 method are shown in Figure 2 to Figure 4. SOC is included in all calculations. VBM is adapted to zero. VBM and CBM characteristics are not affected after eliminating cation (red lines). Band gap is slightly decreased. Rashba band splitting due to the spin-orbit coupling of Pb is obvious for MAPbI<sub>3</sub> and FAPbI<sub>3</sub> (Mosconi, Etienne, and De Angelis 2017). Since CsPbI<sub>3</sub> has the perfect cubic symmetry, no splitting is predicted and there is a degeneracy at valence and conduction band. Any band in blue that has not a correspondence red line belongs to cation.

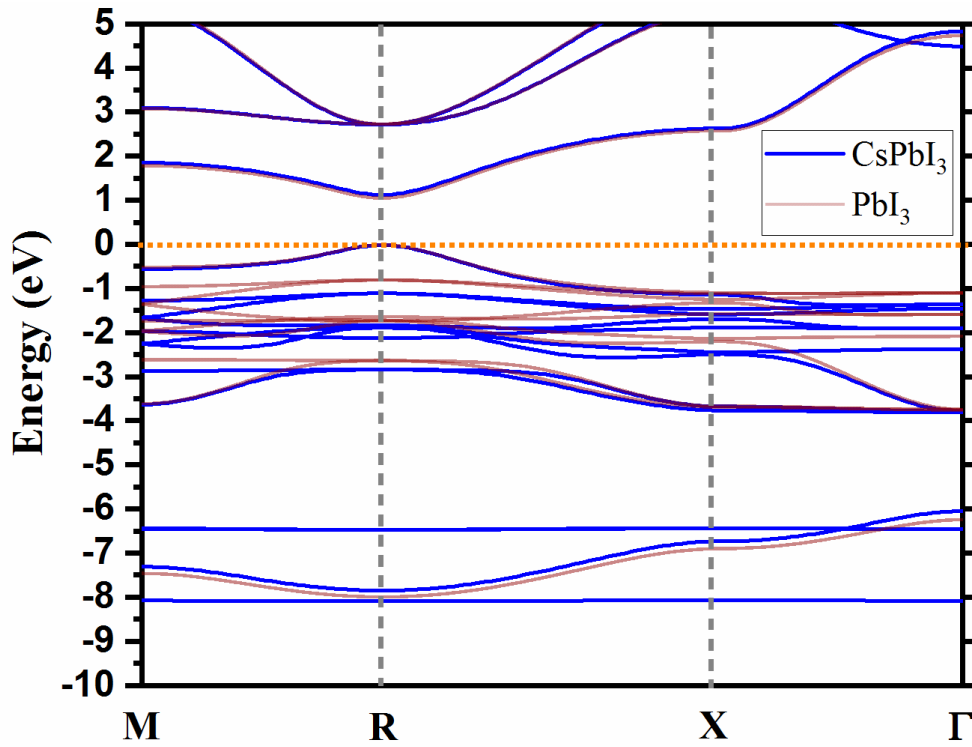

Figure 2: Band structure of CsPbI<sub>3</sub> in blue and PbI<sub>3</sub> (no cation) in red using DFT-1/2 method. Direct band gap is obtained at R point. VBM is adapted to zero.

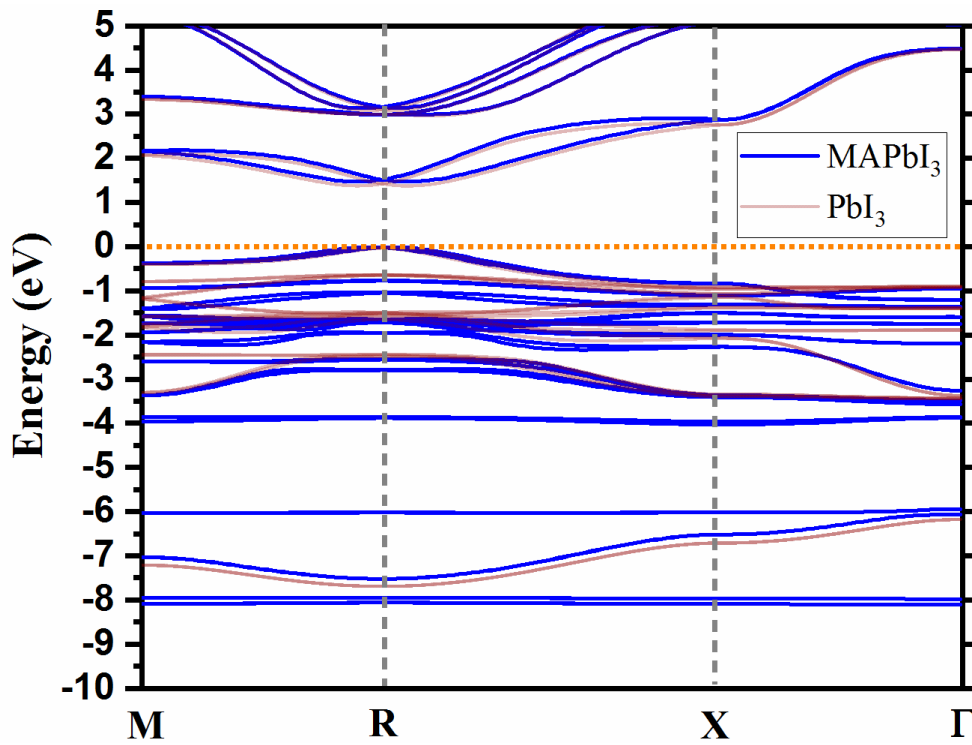

Figure 3: Band structure of MAPbI<sub>3</sub> in blue and PbI<sub>3</sub> (no cation) in red using DFT-1/2 method. Direct band gap is obtained at R point. VBM is adapted to zero.

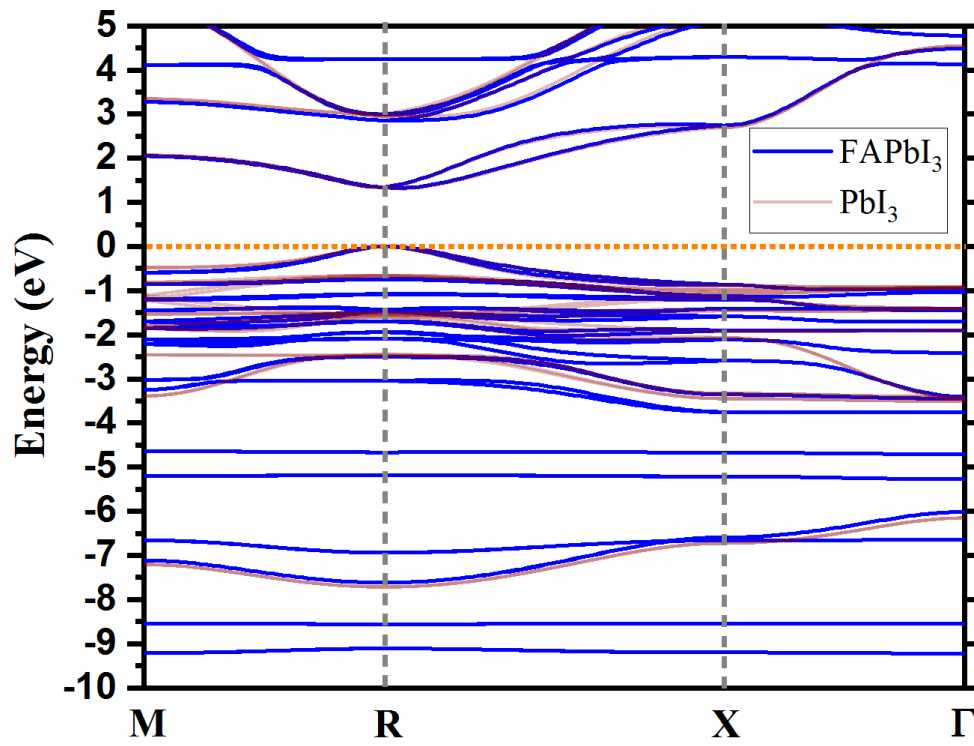

Figure 4: Band structure of FAPbI<sub>3</sub> in blue and PbI<sub>3</sub> (no cation) in red using DFT-1/2 method. Direct band gap is obtained at R point. VBM is adapted to zero.

- Mosconi, Edoardo, Thibaud Etienne, and Filippo De Angelis. 2017. "Rashba Band Splitting in Organohalide Lead Perovskites: Bulk and Surface Effects." *The Journal of Physical Chemistry Letters* 8(10): 2247–52. <https://pubs.acs.org/doi/10.1021/acs.jpcllett.7b00328>.
- Wang, Sanjun, Wen-bo Xiao, and Fei Wang. 2020. "Structural, Electronic, and Optical Properties of Cubic Formamidinium Lead Iodide Perovskite: A First-Principles Investigation." *RSC Advances* 10(54): 32364–69. <http://xlink.rsc.org/?DOI=D0RA06028C>.
- Zhu, H. X., and J.-M. Liu. 2016. "Electronic Structure of Organometal Halide Perovskite CH<sub>3</sub>NH<sub>3</sub>BiI<sub>3</sub> and Optical Absorption Extending to Infrared Region." *Scientific Reports* 6(1): 37425. <http://www.nature.com/articles/srep37425>.
